# Supplementary material for: Involvement of PAR-4 in Cannabinoid-Dependent Sensitization of Osteosarcoma Cells to TRAIL-Induced Apoptosis
Source: PubMed Central journal article supplement — Int J Biol Sci. 2014 Apr 8;10(5):466–78. doi: 10.7150/ijbs.8337 (PMC4007360; doi:10.7150/ijbs.8337), 2014-04-08

### Supplementary Fig. 1. Effects of the highest dose of WIN on MG63 cell cycle distribution.

Flow cytometric analysis was carried out on propidium iodide stained cells treated for 24 h or 48 h with 20  $\mu\text{M}$  WIN in the presence or absence of 100  $\mu\text{M}$  z-VAD. The percentage of cells in each phase of the cell cycle was calculated using Expo32 software. The plots are representative of three independent experiments.

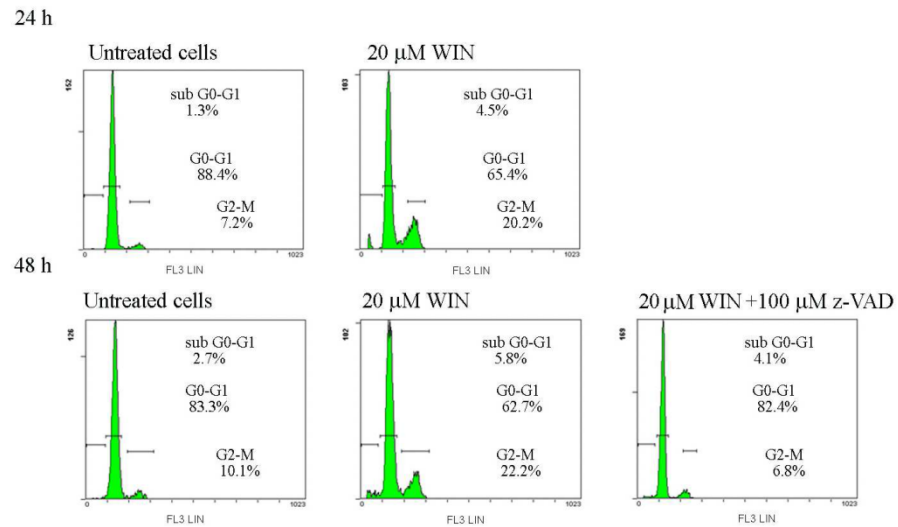

Supplement: ijbsv10p0466s1.pdf [file ijbsv10p0466s1.pdf]
